# Supplementary material for: COVID-19 Impact on Teachers’ Organizational Commitment in Schools
Source: Frontiers journal article supplement (doi:10.3389/fpsyg.2022.810015), 2022-05-31
Supplement: Data_Sheet_1.PDF [file Data_Sheet_1.PDF]

## Appendix 1. Organizational Commitment Scale (Rank between 1-5)

---

|                           |                                                                                                                    |
|---------------------------|--------------------------------------------------------------------------------------------------------------------|
| Affective<br>Commitment   | I would be very happy to spend the rest of my career with this organization.                                       |
|                           | I really feel as if this organization's problems are my own.                                                       |
|                           | I do not feel a strong sense of "belonging" to my organization. (R)                                                |
|                           | I do not feel "emotionally attached" to this organization. (R)                                                     |
|                           | I do not feel like "part of the family" at my organization. (R)                                                    |
|                           | This organization has a great deal of personal meaning for me                                                      |
| Continuance<br>Commitment | Right now, staying with my organization is a matter of necessity as much as desire.                                |
|                           | It would be very hard for me to leave my organization right now, even if I wanted to.                              |
|                           | Too much of my life would be disrupted if I decided I wanted to leave my organization now.                         |
|                           | I feel that I have too few options to consider leaving this organization.                                          |
|                           | If I had not already put so much of myself into this organization, I might consider working elsewhere.             |
| Normative<br>Commitment   | One of the few negative consequences of leaving this organization would be the scarcity of available alternatives. |
|                           | I do not feel any obligation to remain with my current employer. (R)                                               |
|                           | Even if it were to my advantage, I do not feel it would be right to leave my organization now.                     |
|                           | I would feel guilty if I left my organization now.                                                                 |
|                           | I would not leave my organization right now because I have a sense of obligation to the people in it.              |
|                           | I would feel guilty if I left my organization now.                                                                 |
|                           | I owe a great deal to my organization.                                                                             |

---
